# Supplementary material for: An ESIPT-ICT steered naphthylthioic-based ionic probe with dual emissive channels exhibiting CHEF and CHEQ effects
Source: Royal Society of Chemistry journal article supplement (doi:10.1039/d2ra04568k), 2022-01-01
Supplement: d2ra04568k1.pdf [file d2ra04568k1.pdf]

## An ESIPT-ICT ignited naphthylthioic-based ionic probe with dual emissive channels exhibiting CHEF and CHEQ effects

Martha N Amputu, Johannes Naimhwaka, Veikko Uahengo\*

Department of Physics, Chemistry and Material Science, University of Namibia, 340 Mandume Ndemufayo Avenue, Windhoek, 9000, Namibia

\*Corresponding author. Tel: +264 61 206 3465. E-mail address: vuahengo@unam.na or vuahengo@gmail.com (Veikko Uahengo)

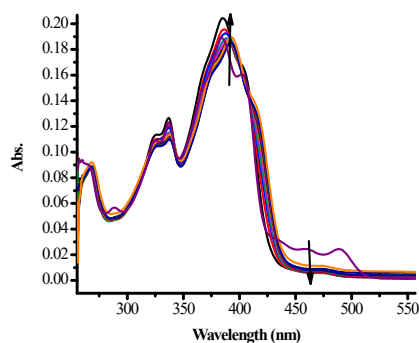

(a)

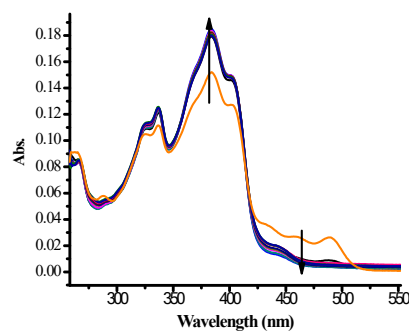

(b)

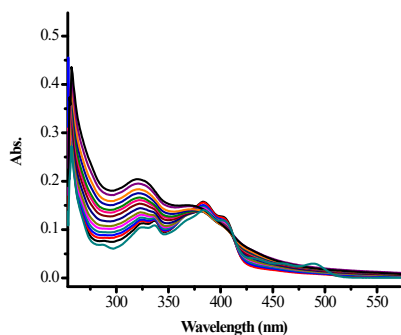

(c)

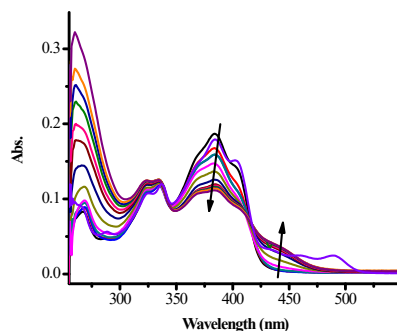

(d)

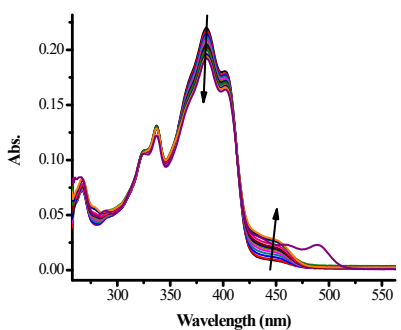

(e)

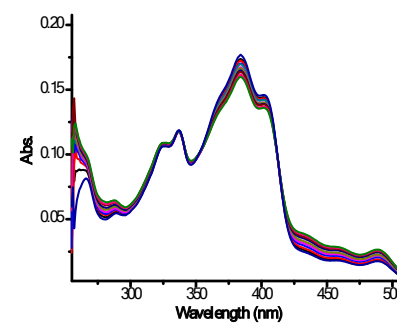

(f)

**Figure S1:** The absorption titration spectra of **M** ( $1 \times 10^{-5}$  M) in DMSO-H<sub>2</sub>O, with 3 equiv. of (a) Ag<sup>+</sup>, (b) Al<sup>3+</sup>, (c) Fe<sup>3+</sup>, (d) Hg<sup>2+</sup>, (e) Sn<sup>2+</sup> and (f) Na<sup>+</sup> and Li<sup>+</sup>, all at room temperature

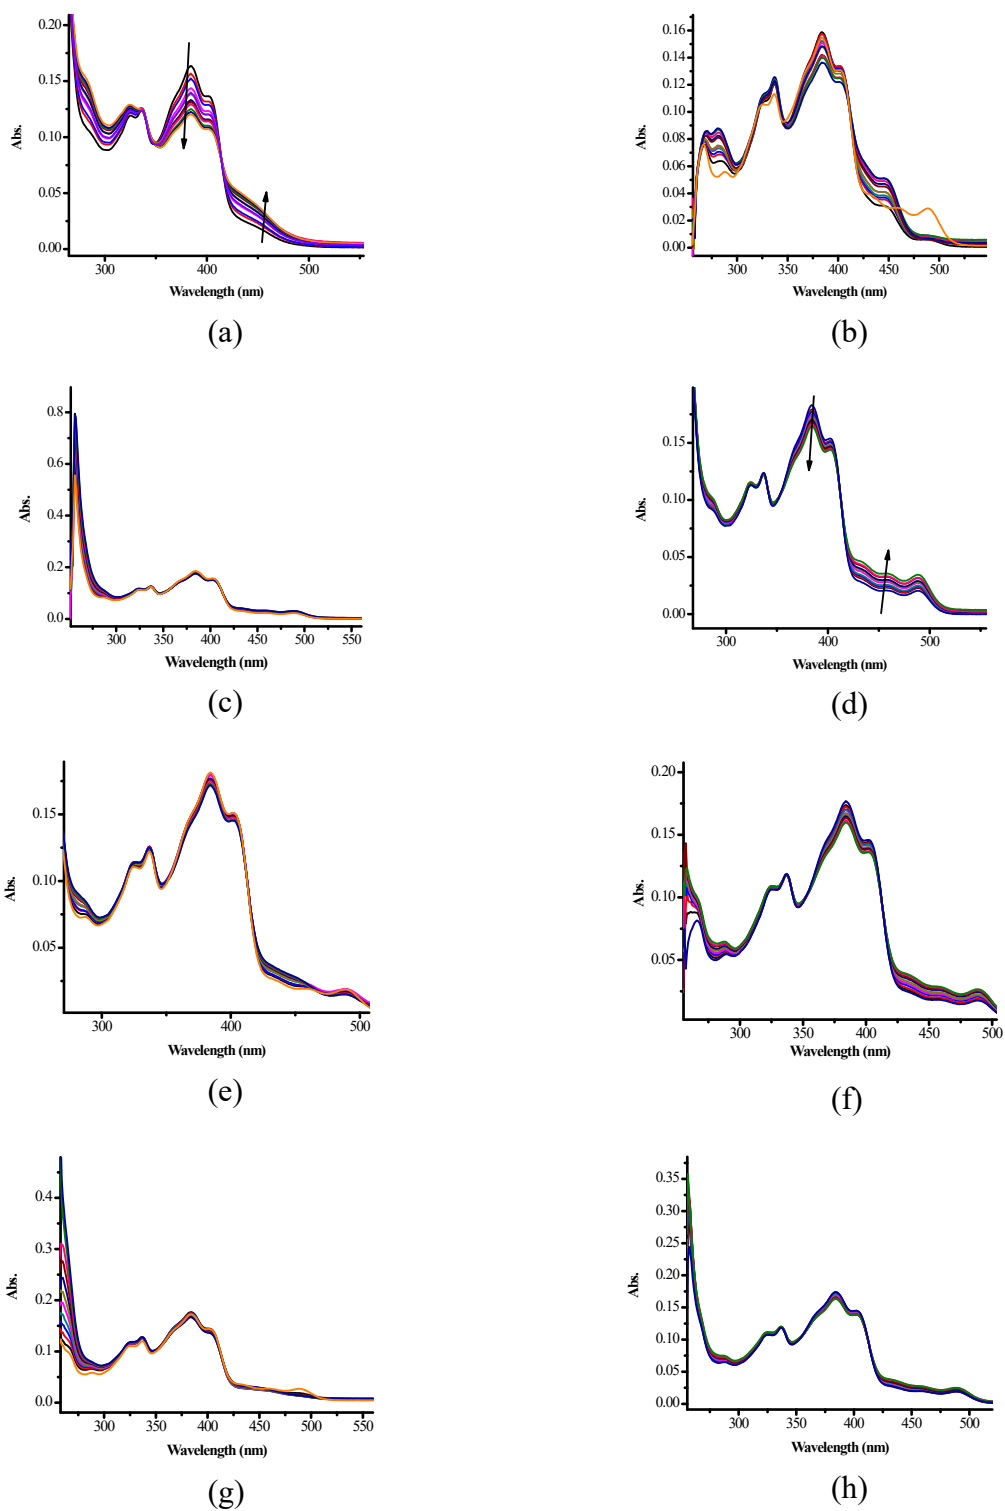

**Figure S2:** The absorption titration spectra of **M** ( $1 \times 10^{-5}$  M) in DMSO- $H_2O$ , with varying equiv. of (a)  $Co^{2+}$ , (b)  $Cd^{2+}$ , (c)  $Cr^{3+}$ , (d)  $Mg^{2+}$ , and (e)  $Mn^{2+}$ , (f)  $Na^+$ , (g)  $Pb^{2+}$  and (h)  $Sn^{2+}$  at room temperature

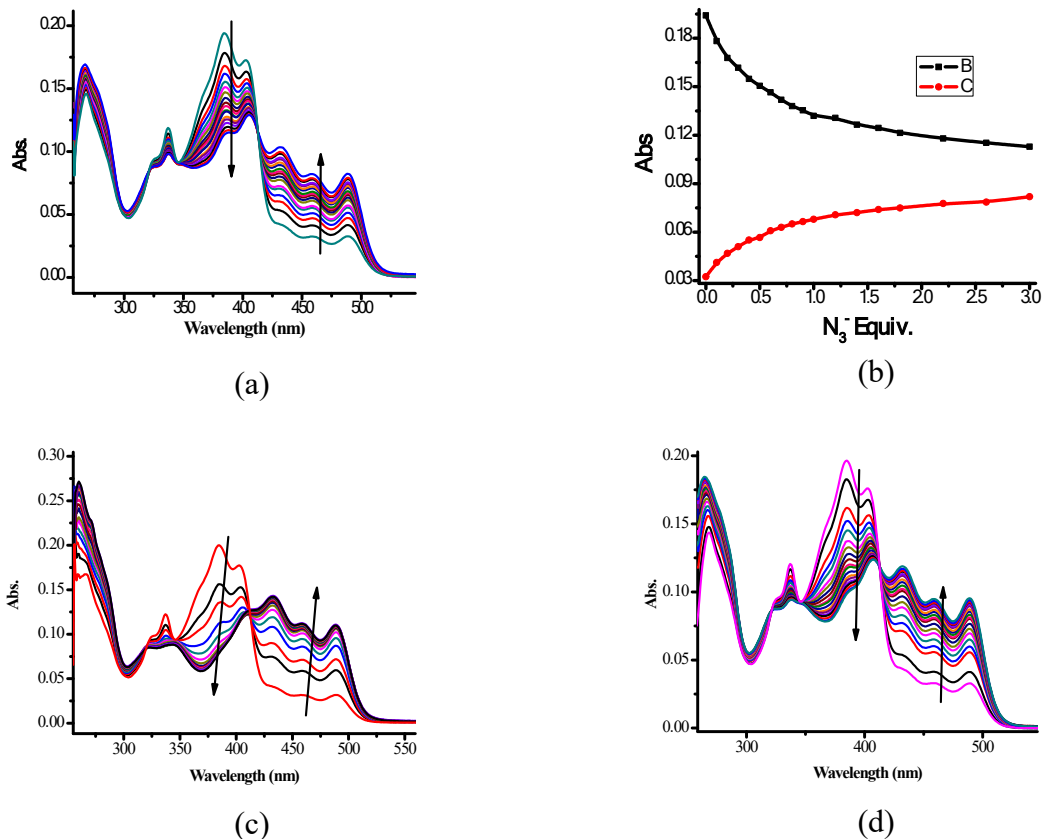

**Figure S3:** The absorption titration spectra of **M** ( $1 \times 10^{-5}$  M) in DMSO- $H_2O$ , with up to 5 equiv. of (a)  $N_3^-$ , (b)  $N_3^-$  titration profile, (c)  $OH^-$  and (d)  $OCN^-$  at room temperature

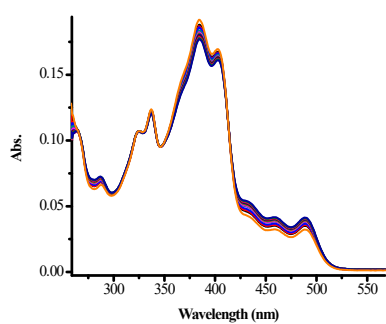

(a)

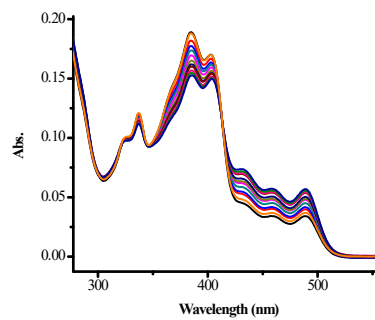

(b)

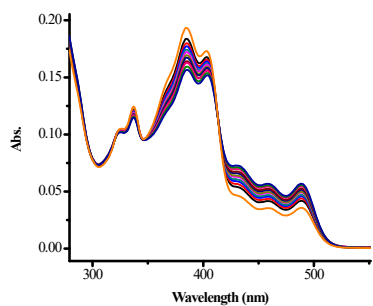

(c)

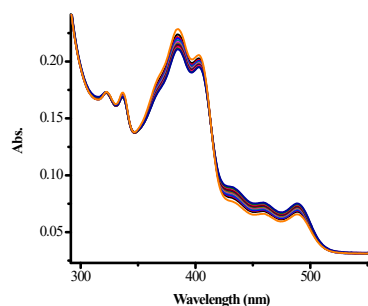

(d)

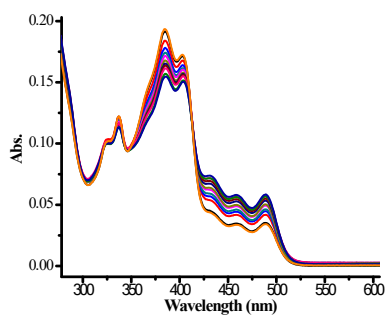

(e)

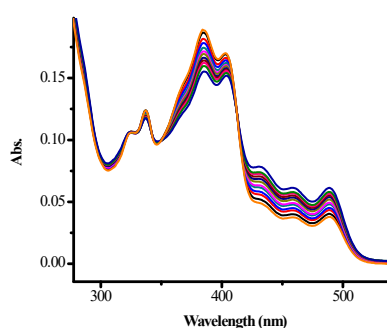

(f)

**Figure S4:** The absorption titration spectra of **M** ( $1 \times 10^{-5}$  M) in DMSO-H<sub>2</sub>O, with up to 5 equiv. of (a) Br<sup>-</sup>, (b) Cl<sup>-</sup>, (c) ClO<sub>4</sub><sup>-</sup>, and (d) HSO<sub>4</sub><sup>-</sup> (e) I<sup>-</sup> and (f) NO<sub>3</sub><sup>-</sup>, at room temperature

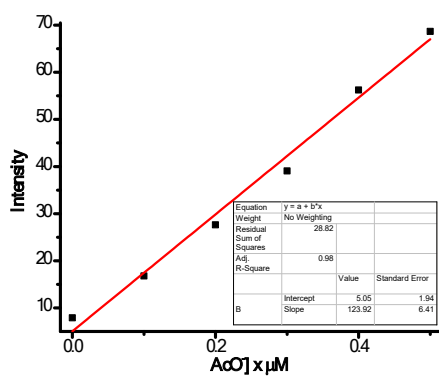

(a)

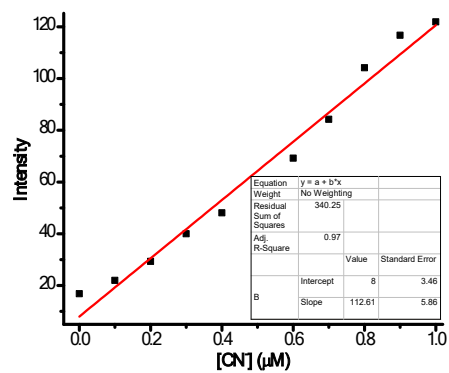

(b)

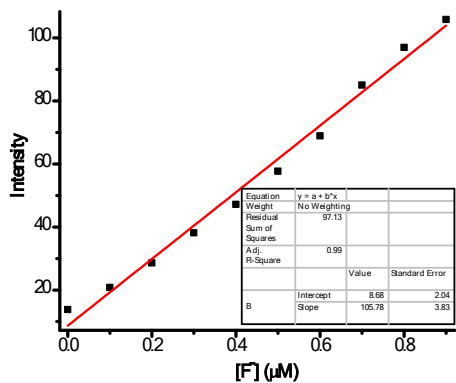

(c)

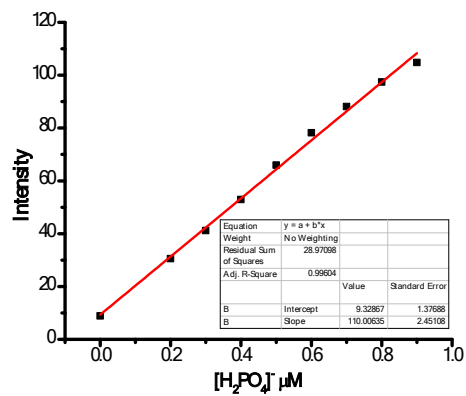

(d)

**Figure S5:** The Fluorescence signals of **M** ( $1 \times 10^{-5}$  M) in DMSO-H<sub>2</sub>O, to changing conc. of (a) AcO<sup>-</sup> (0-0.5 μM) at 515, (b) CN<sup>-</sup> (0-1.0 μM), (c) F<sup>-</sup> (0-1.0 μM), at 520, and (d) H<sub>2</sub>PO<sub>4</sub><sup>-</sup> (0-1.0 μM) at 530 nm.

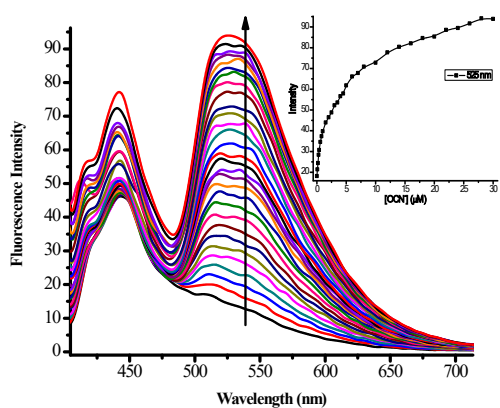

(a)

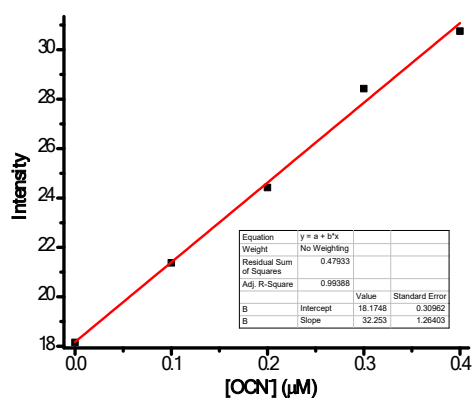

(b)

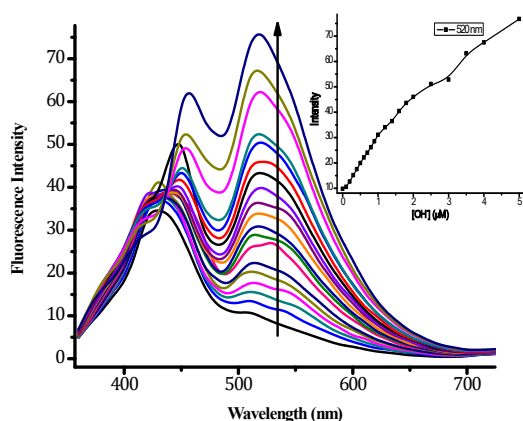

(c)

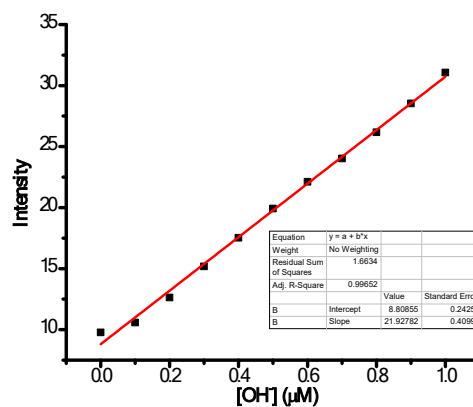

(d)

**Figure S6:** The Fluorescence titration spectra of **M** ( $1 \times 10^{-5}$  M) in DMSO-H<sub>2</sub>O, (a) upon the addition of 25 equiv. of OCN<sup>-</sup> and (b) Fluorescence signals of **M** to changing conc. of OCN<sup>-</sup> (0-0.4 μM) at 525 nm, (c) upon the addition of 5 equiv. of OH<sup>-</sup>, and (d) Fluorescence signals of **M** to changing conc. of OH<sup>-</sup> (0-1.0 μM), at 520.

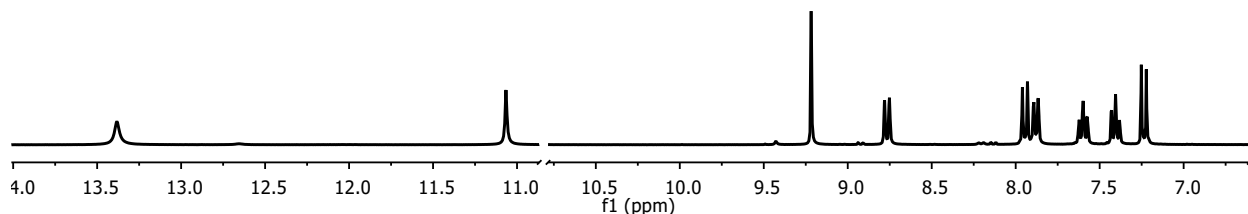

**Figure S7:** <sup>1</sup>H NMR spectral of **M** in DMSO-*d*<sub>6</sub>
